# Supplementary material
Source: publisher figshare collection journal article supplement (https://acs.figshare.com/ndownloader/files/5102836)
Supplement: Supplementary file 1 [file 5102836]

HEADER    PROTEIN
COMPND    h2h2o.pdb 
AUTHOR    GENERATED BY BABEL 1.6 
ATOM      1  H   UNK     1      -0.020   0.037  -0.033  1.00  0.00 
ATOM      2  O   UNK     1       0.040   0.900   0.828  1.00  0.00 
ATOM      3  O   UNK     1      -0.123  -0.724  -0.982  1.00  0.00 
ATOM      4  H   UNK     1      -0.817   1.311   1.066  1.00  0.00 
ATOM      5  H   UNK     1       0.517   0.677   1.654  1.00  0.00 
ATOM      6  H   UNK     1       0.463  -0.519  -1.740  1.00  0.00 
ATOM      7  H   UNK     1      -0.061  -1.683  -0.794  1.00  0.00 
CONECT    1    2    3
CONECT    2    1    4    5
CONECT    3    1    6    7
CONECT    4    2
CONECT    5    2
CONECT    6    3
CONECT    7    3
MASTER        0    0    0    0    0    0    0    0    7    0    7    0
END
